# Supplementary material for: Bifidobacterium animalis F1-7 in combination with konjac glucomannan improves constipation in mice via humoral transport
Source: Royal Society of Chemistry journal article supplement (doi:10.1039/d0fo02227f), 2020-12-10
Supplement: d0fo02227f1.pdf [file d0fo02227f1.pdf]

**Table S1** Standard commercial mouse feed

| <b>Component</b> | <b>Content</b>         |
|------------------|------------------------|
| corn             | 320 g kg <sup>-1</sup> |
| bran             | 260 g kg <sup>-1</sup> |
| soybean cake     | 290 g kg <sup>-1</sup> |
| salt             | 10 g kg <sup>-1</sup>  |
| bone meal        | 10 g kg <sup>-1</sup>  |
| lysine           | 10 g kg <sup>-1</sup>  |
| water            | 100 g kg <sup>-1</sup> |

**Table S2** Gradient elution procedure

| <b>Procedure</b> | <b>Time(min)</b> | <b>Intervals(min)</b> | <b>%A</b> | <b>%B</b> | <b>Notes</b>      |
|------------------|------------------|-----------------------|-----------|-----------|-------------------|
| 0                | 0                | 0                     | 60        | 40        | Injection         |
| 1                | 3                | 3                     | 70        | 30        | Gradient elution  |
| 2                | 6                | 3                     | 78        | 22        | Gradient elution  |
| 3                | 10               | 4                     | 78        | 22        | Gradient elution  |
| 4                | 15               | 5                     | 98        | 2         | Gradient elution  |
| 5                | 17               | 2                     | 98        | 2         | Isocratic elution |
| 6                | 18               | 1                     | 60        | 40        | Gradient elution  |
| 7                | 23               | 5                     | 60        | 40        | Isocratic elution |
